# Supplementary material for: Reduced tubulin polyglutamylation suppresses flagellar shortness in Chlamydomonas
Source: PubMed Central journal article supplement — Mol Biol Cell. 2015 Aug 1;26(15):2810–22. doi: 10.1091/mbc.E15-03-0182 (PMC4571340; doi:10.1091/mbc.e15-03-0182), 2015-08-01
Supplement: supp_E15-03-0182v1_E15-03-0182SupplData.pdf [file supp_E15-03-0182v1_E15-03-0182SupplData.pdf]

# Supplemental Materials

*Molecular Biology of the Cell*

Kubo et al.

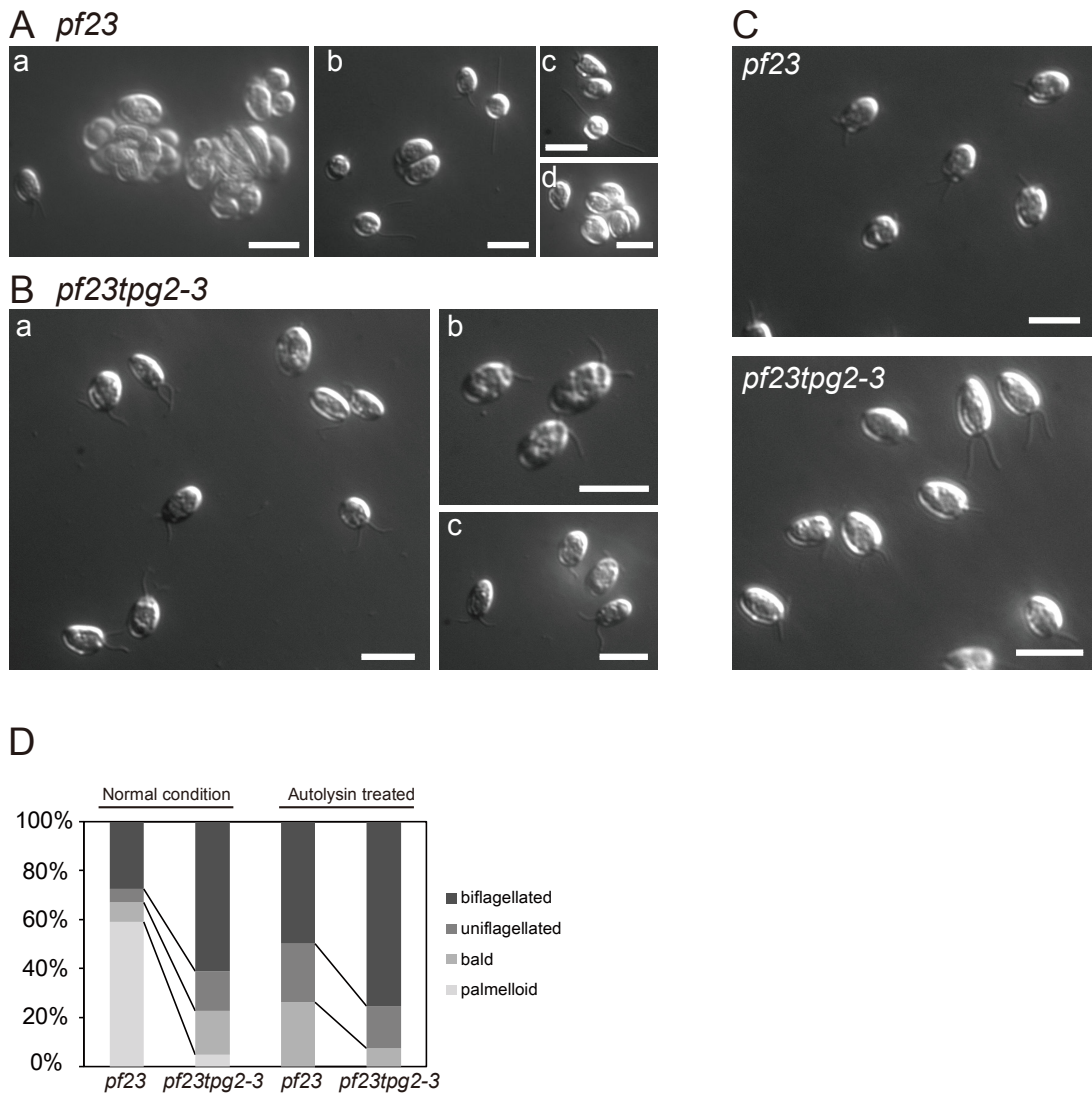

**Supplemental Figure S1. The *tpg2-3* mutation facilitates the flagellar growth of *pf23*.**

*pf23* (A(a-d)) and *pf23tpg2-3* (B(a-c)) in M-medium, or in M-medium containing autolysin (C) observed by DIC microscopy. Bars, 10  $\mu$ m. (D) Presence or absence of flagella on *pf23* and *pf23tpg2-3* cells in M-medium (Normal condition) or M-medium containing autolysin. Biflagellated (cells with two flagella), uniflagellated (one flagella), bald (no flagella), and palmelloid cells were counted.

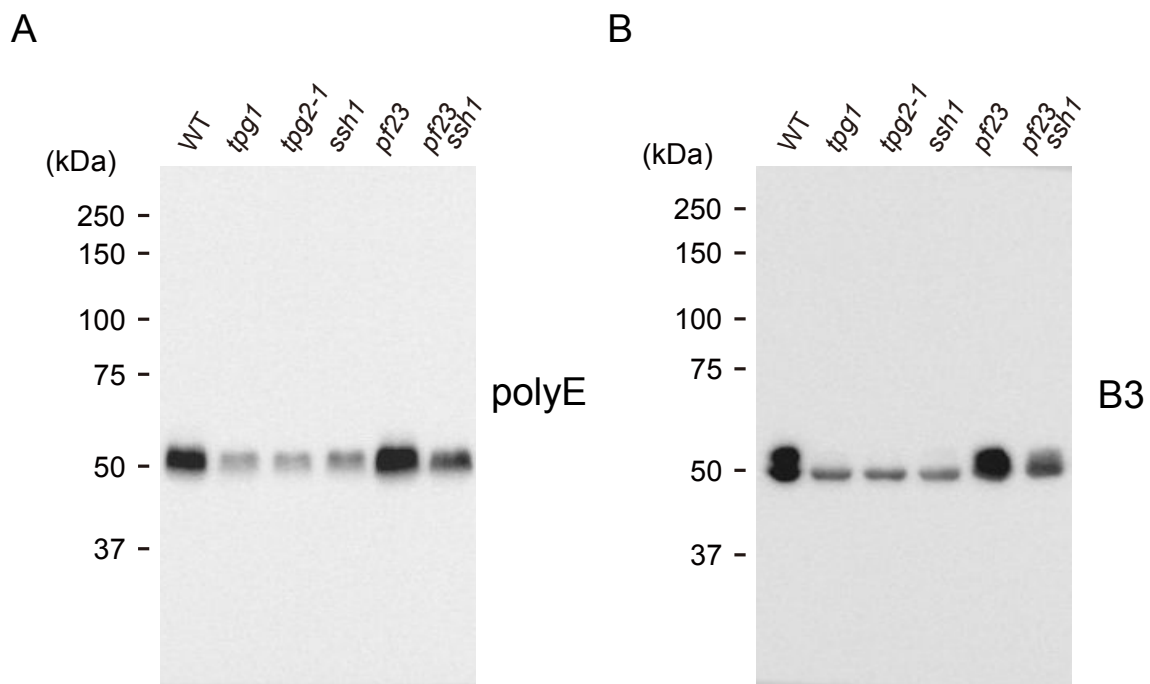

**Supplemental Figure S2. The polyE antibody recognizes only tubulins in the axoneme.**

Western blot analyses of axonemes using polyE antibody (A) and B3 antibody (B). Images obtained from the same membranes were used in Figure 1B except that the entire blots are shown here and the membranes were exposed for a longer time to detect any minor signals that might be present. The polyE antibody was produced against Cys-E<sub>9</sub> [1] and should recognize polyglutamate side chains of at least three or more glutamates [2], whereas the B3 antibody recognizes tubulins with two or more glutamate side chains [3]. The result that the polyE antibody recognized only tubulin indicates that there are no other major substrates of polyglutamylation in the axoneme.

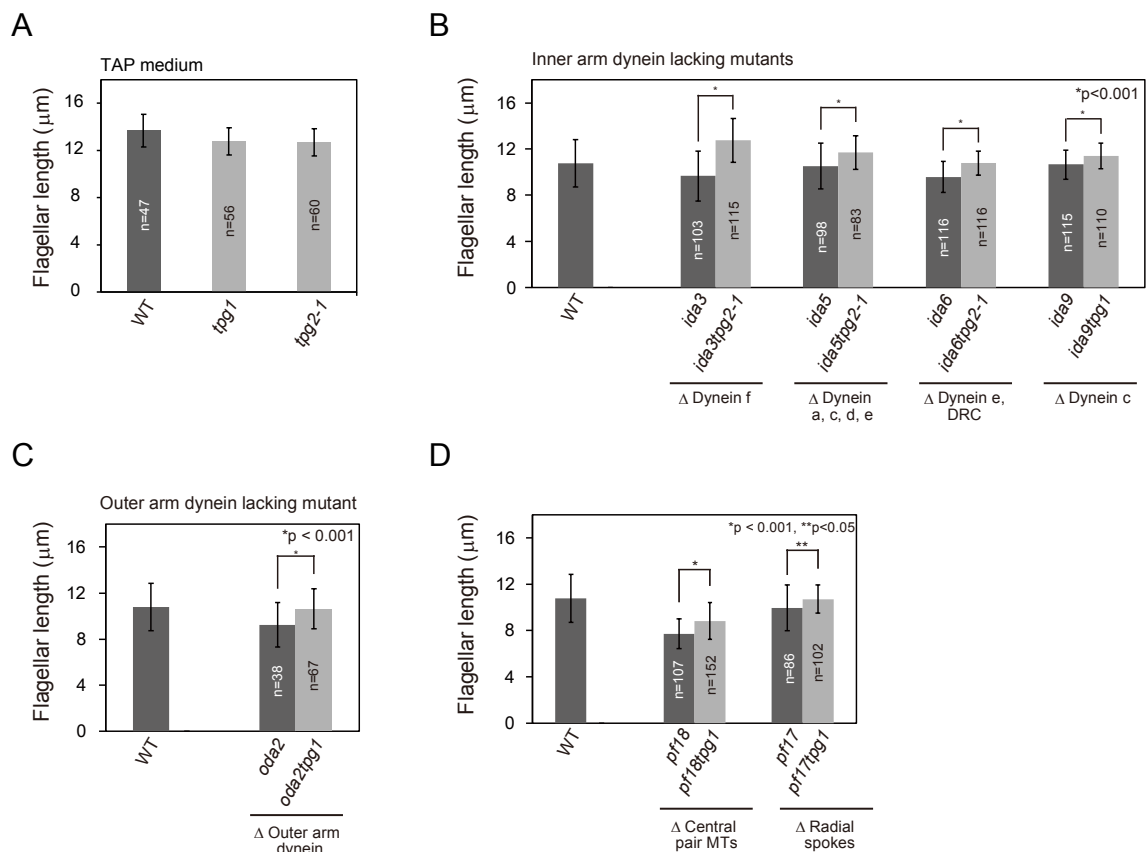

### Supplemental Figure S3. Flagellar length of mutants lacking various components of the axoneme.

(A) Flagellar length of wild type, *tpg1*, and *tpg2-1* cultured in TAP medium. (B) Flagellar length in wild type (WT), *ida3*, *ida3tpg2-1*, *ida5*, *ida5tpg2-1*, *ida6*, *ida6tpg2-1*, *ida9*, and *ida9tpg1*. (C) Flagellar length in *oda2* and *oda2tpg1*. (D) Flagellar length in *pf18*, *pf18tpg1*, *pf17*, and *pf17tpg1*. Cells in B, C, and D were cultured in M-medium. Data for wild type are from Figure 3. Standard deviations for each measurement are shown as bars. Asterisks indicate statistically significant differences (t-test, \* $P < 0.001$  or \*\* $P < 0.05$ ).

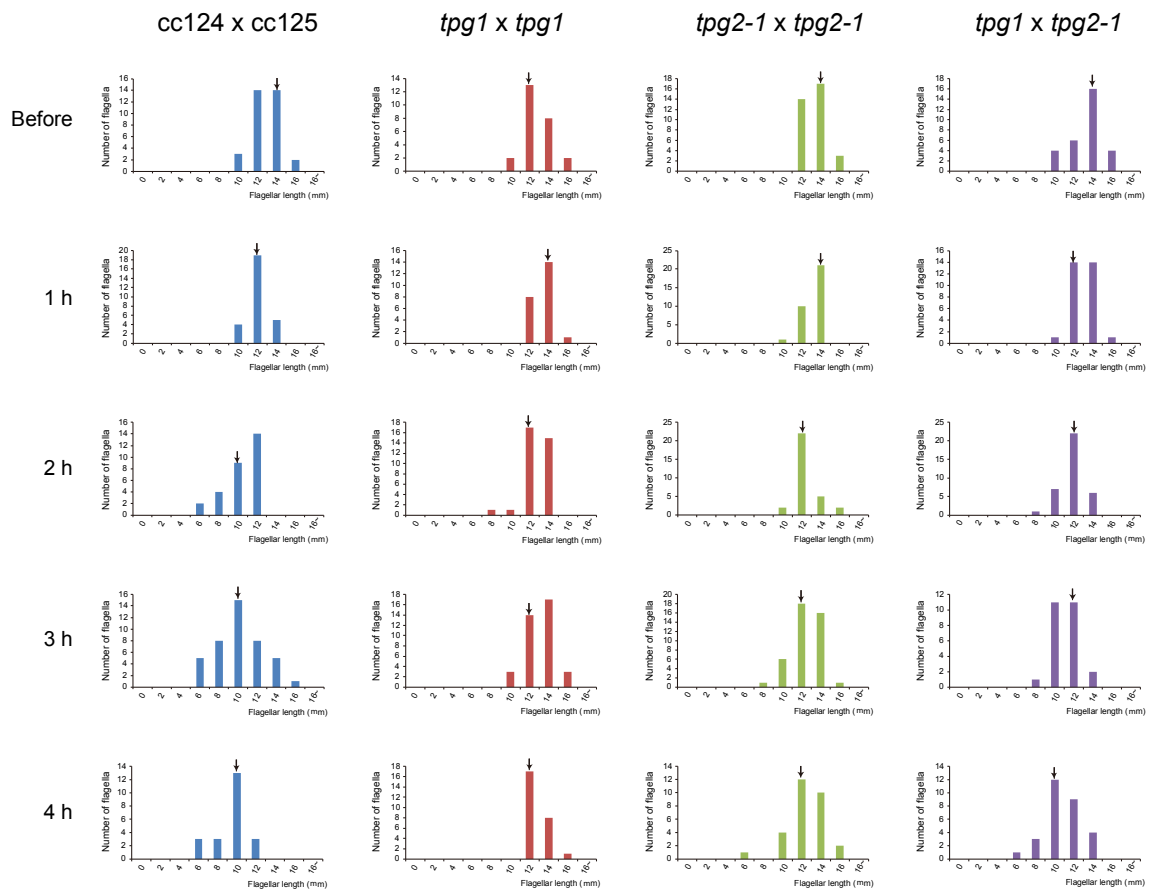

### Supplemental Figure S4. Tubulin polyglutamylation deficiency inhibits flagellar shortening after mating.

Histograms of dikaryon flagellar lengths after the mating between CC124 and CC125, *tpg1* and *tpg1*, *tpg2-1* and *tpg2-1*, and *tpg1* and *tpg2-1*. The same data sets were used in Figure 4B. Non-flagellated cells were excluded from the flagellar length measurements. Note that the flagellar-length peaks of wild-type and *tpg1-tpg2-1* dikaryons gradually shift toward shorter lengths during the time course, reflecting the rate of the slow flagellar-shortening phase. Those of the *tpg1* and *tpg2-1* dikaryons did not undergo this shift. The arrows indicate the average lengths of the flagella at each time point.

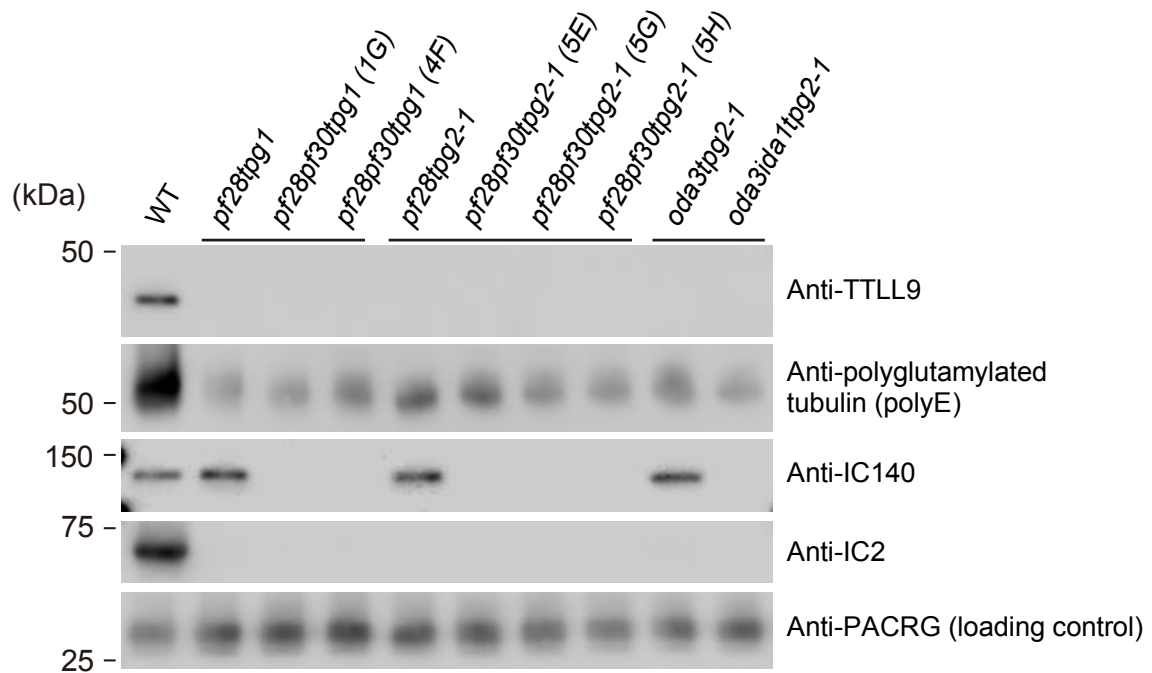

**Supplemental Figure S5. Generation of triple mutants lacking outer arm dynein, inner arm dynein f/I1, and tubulin polyglutamylation.**

Western blot analysis of isolated axonemes to confirm the production of triple mutants. Western blots of axonemes of wild type (WT), the double mutants *pf28tpg1*, *pf28tpg2-1*, and *oda3tpg2-1*, and candidate strains for *pf28pf30tpg1*, *pf28pf30tpg2-1*, and *oda3ida1tpg2-1*, probed with anti-TTLL9, anti-polyglutamylated tubulin (polyE), anti-IC140 (dynein f/I1 intermediate chain), anti-IC2 (outer arm dynein intermediate chain), and anti-PACRG (for loading control) antibodies. For experiments with *pf28pf30tpg1* and *pf28pf30tpg2-1* (Figure 2), 1G and 5E strains were used respectively.

**Table S1**

| Name                             | Strain                                  | Missing component/protein                                       | Mutated protein           | Mutated gene                             | Reference        |
|----------------------------------|-----------------------------------------|-----------------------------------------------------------------|---------------------------|------------------------------------------|------------------|
| Wild type                        | CC124, CC125                            |                                                                 |                           |                                          |                  |
| <i>pf23</i>                      |                                         | Inner-arm dynein a, c, d, f                                     | DYX1C1                    | <i>DYX1C1</i>                            | [4]              |
| <i>ssh1</i><br>( <i>tpg2-3</i> ) | A kind gift from Dr. Gianni Piperno     | FAP267 (TTLL9), FAP234                                          | FAP234                    | <i>TPG2</i>                              | [5]              |
| <i>tpg1</i>                      |                                         | FAP267 (TTLL9), FAP234                                          | FAP267                    | <i>TPG1</i>                              | [6]              |
| <i>tpg2-1</i>                    |                                         | FAP267 (TTLL9), FAP234                                          | FAP234                    | <i>TPG2</i>                              | [7]              |
| <i>pf28pf30ssh1</i>              | W4, a kind gift from Dr. David Mitchell | Inner arm dynein f/II, outer arm dynein, FAP267 (TTLL9), FAP234 | DHC1, $\gamma$ HC, FAP234 | <i>DHC1</i> , <i>DHC15</i> , <i>TPG2</i> | [8]              |
| <i>oda2</i>                      | CC2230, CC2231                          | Outer-arm dynein                                                | $\gamma$ HC               | <i>DHC15</i>                             | [9-11]           |
| <i>ida1</i>                      | CC2664, CC2665                          | Dynein f                                                        | DHC1                      | <i>DHC1</i>                              | [12-17]          |
| <i>ida3</i>                      | CC2668, CC2669                          | Dynein f                                                        |                           |                                          | [12]             |
| <i>ida4</i>                      | CC2670, CC2671                          | Dynein a, c, d                                                  | p28                       | <i>DIII</i>                              | [12], [13], [18] |
| <i>ida5</i>                      | CC3420, CC3421                          | Dynein a, c, d, e                                               | Actin                     | <i>DII4</i>                              | [19], [20]       |
| <i>ida6</i>                      | CC3090, CC3091                          | Dynein e                                                        |                           |                                          | [20]             |
| <i>ida9</i>                      | CC4074                                  | Dynein c                                                        | DHC9                      | <i>DHC9</i>                              | [21]             |
| <i>pf17</i>                      | CC262                                   | RSP1, 4, 6, 9, 10                                               | RSP9                      | <i>RSP9</i>                              | [22]             |
| <i>pf18</i>                      | CC1036                                  | Central pair                                                    |                           |                                          | [23], [24]       |
| <i>fla10-1</i>                   | CC1919                                  | Anterograde IFT lost at 32°C                                    | FLA10                     | <i>FLA10</i>                             | [25-27]          |

**Table S2.**

| Antibody                              | Dilution for WB | Dilution for IFM | Animal/type            | Source        |
|---------------------------------------|-----------------|------------------|------------------------|---------------|
| Anti- $\alpha$ -tubulin (B-5-1-2)     | 1:5,000         | N/A              | Mouse-monoclonal IgG1  | Sigma-Aldrich |
| Anti-acetylated tubulin (6-11B-1)     | N/A             | 1:500            | Mouse-monoclonal IgG2b | Abcam         |
| Anti-polyglutamylated tubulin (B3)    | 1:2,000         | N/A              | Mouse-monoclonal IgM   | Abcam         |
| Anti-polyglutamylated tubulin (polyE) | 1:2,000         | N/A              | Rabbit-polyclonal      | [1]           |
| Anti-FAP234C                          | 1:1,000         | N/A              | Rabbit-polyclonal      | [7]           |
| Anti-TTLL9                            | 1:1,000         | N/A              | Rabbit-polyclonal      | [6]           |
| Anti-IFT172                           | 1:20            | N/A              | Mouse-monoclonal IgG1  | [28]          |
| Anti-IFT139                           | 1:100           | N/A              | Mouse-monoclonal IgG2a | [28]          |
| Anti-IFT81                            | 1:100           | N/A              | Mouse-monoclonal IgG1  | [28]          |
| Anti-IFT57                            | 1:20            | N/A              | Mouse-monoclonal IgG2a | [28]          |
| Anti-IFT46                            | N/A             | 1:2000           | Rabbit-polyclonal      | [29]          |
| Anti-DHC1b                            | 1:2,000         | N/A              | Rabbit-polyclonal      | [30]          |
| Anti-D1bLIC                           | 1:2,000         | N/A              | Rabbit-polyclonal      | [31]          |
| Anti-IC2                              | 1:50            | N/A              | Mouse monoclonal IgG   | [32]          |
| Anti-IC140                            | 1:10,000        | N/A              | Rabbit-polyclonal      | [33]          |
| Anti-PACRG                            | 1:5,000         | N/A              | Rabbit-polyclonal      | [34]          |
| Anti-HA tag (3F10)                    | 1:2,000         | 1:100            | Rat-monoclonal IgG1    | Roche         |
| Anti- $\beta$ F1-ATPase               | 1:80,000        | N/A              | Rabbit-polyclonal      | Agrisera      |

N/A; not applicable



### References for Supplemental data

- [1] Shang Y, Li B, Gorovsky MA (2002). *Tetrahymena thermophila* contains a conventional gamma-tubulin that is differentially required for the maintenance of different microtubule-organizing centers. *J Cell Biol* 158, 1195-1206.
- [2] Wloga D, Rogowski K, Sharma N, Van Dijk, Janke C, Eddé B, Bré MH, Levilliers N, Redeker V, Duan J, Gorovsky MA, Jerka-Dziadosz M, Gaertig J (2008). Glutamylation on alpha-tubulin is not essential but affects the assembly and functions of a subset of microtubules in *Tetrahymena thermophile*. *Eukaryot Cell* 7, 1362-1372.
- [3] Gagnon C, White D, Cosson J, Huitorel P, Eddé B, Desbruyères E, Paturle-Lafanechère L, Multigner L, Job D, Cibert C (1996). The polyglutamylated lateral chain of alpha-tubulin plays a key role in flagellar motility. *J Cell Sci* 109, 1545-1553.
- [4] Huang B, Piperno G, Luck DJ (1979). Paralyzed flagella mutants of *Chlamydomonas reinhardtii* defective for axonemal doublet microtubule arms. *J Biol Chem* 254, 3091-3099.
- [5] LeDizet M, Piperno G (1995). The Light Chain p28 Associates with a Subset of Inner Dynein Arm Heavy Chains in *Chlamydomonas* Axonemes. *Mol Biol Cell* 6, 697-711.
- [6] Kubo T, Yanagisawa HA, Yagi T, Hirono M, Kamiya R (2010). Tubulin polyglutamylation regulates axonemal motility by modulating activities of inner-arm dyneins. *Curr Biol* 20, 441-445.
- [7] Kubo T, Yanagisawa HA, Liu Z, Shibuya R, Hirono M, Kamiya R (2014). A conserved flagella-associated protein in *Chlamydomonas*, FAP234, is essential for axonemal localization of tubulin polyglutamylase TTLL9. *Mol Biol Cell* 25, 107-117.
- [8] Freshour J, Yokoyama R, Mitchell DR (2007). *Chlamydomonas* flagellar outer row dynein assembly protein ODA7 interacts with both outer row and I1 inner row dyneins. *J Biol Chem* 282, 5404-5412.
- [9] Kamiya R (1988). Mutations at twelve independent loci result in absence of outer dynein arms in *Chlamydomonas reinhardtii*. *J Cell Biol* 107, 2253-2258.
- [10] Mitchell DR, Rosenbaum JL (1985). A motile *Chlamydomonas* flagellar mutant that lacks outer dynein arms. *J Cell Biol* 100, 1228-1234.
- [11] Wilkerson CG, King SM, Witman GB (1994). Molecular analysis of the gamma heavy chain of *Chlamydomonas* flagellar outer-arm dynein. *J Cell Sci* 107, 497-506.
- [12] Kamiya R, Kurimoto E, Muto E (1991). Two types of *Chlamydomonas* flagellar mutants missing different components of inner-arm dynein. *J Cell Biol* 112, 441-447.
- [13] Kagami O, Kamiya R (1992). Translocation and rotation of microtubules caused by multiple species of *Chlamydomonas* inner-arm dynein. *J Cell Sci* 103, 653-664.
- [14] Piperno G, Ramanis Z, Smith EF, Sale WS (1990). Three distinct inner dynein arms in *Chlamydomonas* flagella: molecular composition and location in the axoneme. *J Cell Biol* 110, 379-389.
- [15] Myster SH, Knott JA, O'Toole E, Porter ME (1997). The *Chlamydomonas Dhc1* gene encodes a dynein heavy chain subunit required for assembly of the I1 inner arm complex. *Mol Biol Cell* 8, 607-620.
- [16] Myster SH, Knott JA, Wysocki KM, O'Toole E, Porter ME (1999). Domains in the 1 $\alpha$  dynein heavy chain required for inner arm assembly and flagellar motility in *Chlamydomonas*. *J Cell Biol* 146, 801-818.
- [17] Luck DJL, Piperno G (1989). Dynein arm mutants of *Chlamydomonas*. In: *Cell*

Movement: the Dynein ATPases, vol. 1, eds. Warner FD, Satir P, Gibbons IR, New York Alan R Liss Inc, 49-60.

[18] LeDizet M, Piperno G (1995). *ida4-1*, *ida4-2*, and *ida4-3* are intron splicing mutations affecting the locus encoding p28, a light chain of *Chlamydomonas* axonemal inner dynein arms. *Mol Biol Cell* 6, 713-723.

[19] Kato T, Kagami O, Yagi T, Kamiya R (1993). Isolation of two species of *Chlamydomonas reinhardtii* flagellar mutants, *ida5* and *ida6*, that lack a newly identified heavy chain of the inner dynein arm. *Cell Struct Funct* 18, 371-377.

[20] Kato-Minoura T, Hirono M, Kamiya R (1997). *Chlamydomonas* inner-arm dynein mutant, *ida5*, has a mutation in an actin-encoding gene. *J Cell Biol* 137, 649-656.

[21] Yagi T, Minoura I, Fujiwara A, Saito R, Yasunaga T, Hirono M, Kamiya R (2005). An axonemal dynein particularly important for flagellar movement at high viscosity: Implications from a new *Chlamydomonas* mutant deficient in the dynein heavy chain gene DHC9. *J Biol Chem* 280, 41412-41420.

[22] Huang B, Piperno G, Ramanis Z, Luck DJ (1981). Radial spokes of *Chlamydomonas* flagella: genetic analysis of assembly and function. *J Cell Biol* 88, 80-88.

[23] Starling D, Randall J (1971). The flagella of temporary dikaryons of *Chlamydomonas reinhardtii*. *Genet Res Camb* 18, 107-113.

[24] Adams GMW, Huang B, Piperno G, Luck DJL (1981). Central-pair microtubular complex of *Chlamydomonas* flagella: polypeptide composition as revealed by analysis of mutants. *J Cell Biol* 91, 69-76.

[25] Huang B, Rifkin MR, Luck DJL (1977). Temperature-sensitive mutations affecting flagellar assembly and function in *Chlamydomonas reinhardtii*. *J Cell Biol* 72, 67-85.

[26] Adams GMW, Huang B, Luck DJL (1982). Temperature-sensitive, assembly defective flagella mutants of *Chlamydomonas reinhardtii*. *Genetics* 100, 579-586.

[27] Walther Z, Vashishtha M, Hall JL (1994). The *Chlamydomonas FLA10-1* gene encodes a novel kinesin-homologous protein. *J Cell Biol* 126, 175-188.

[28] Cole DG, Diener DR, Himelblau AL, Beech PL, Fuster JC, Rosenbaum JL (1998). *Chlamydomonas* kinesin-II dependent intraflagellar transport (IFT): IFT particles contain proteins required for ciliary assembly in *Caenorhabditis elegans* sensory neurons. *J Cell Biol* 141, 993-1008.

[29] Hou Y, Qin H, Follit JA, Pazour GJ, Rosenbaum JL, Witman GB (2007). Functional analysis of an individual IFT protein: IFT46 is required for transport of outer dynein arms into flagella. *J Cell Biol* 176, 653-665.

[30] Pazour GJ, Dickert BL, Witman GB (1999). The DHC1b (DHC2) isoform of cytoplasmic dynein is required for flagellar assembly. *J Cell Biol* 144, 473-481.

[31] Hou Y, Pazour GJ, Witman GB (2004). A dynein light intermediate chain, D1bLIC, is required for retrograde intraflagellar transport. *J Cell Biol* 15, 4382-4394.

[32] King SM, Witman GB (1990). Localization of an intermediate chain of outer arm dynein by immunoelectron microscopy. *J Biol Chem* 265, 19807-19811.

[33] Yang P, Sale WS (1998). The Mr 140,000 intermediate chain of *Chlamydomonas* flagellar inner arm dynein is a WD-repeat protein implicated in dynein arm anchoring. *Mol Biol Cell* 9, 3335-3349.

[34] Ikeda K, Ikeda T, Morisawa K, Kamiya R (2007). Axonemal localization of *Chlamydomonas* PACRG, a homologue of the human Parkin-coregulated gene product. *Cell Motil Cytoskeleton* 64, 814-821.
